# Supplementary material for: Multi-omics Uncover Neonatal Cecal Cell Development Potentials
Source: Research Square preprint supplement (doi:10.21203/rs.3.rs-1155916/v1), 2021-12-13
Supplement: Supplementary file 1 [file 76683564b519e96db8d3626b.docx]

**Supplementary Information**

**Additional File 1: Fig. S1 Summary of single cell RNA-seq (scRNA-seq) data, related to Figure 1.** **a** Study scheme. **b** Histopathological images of swine cecum at different time points. **c** Summary of single cell RNA seq for cecal mucosa tissue at different time points. **d** Heatmap of the top 25 marker genes in each cluster of cells. **e** The expression pattern of marker genes in different clusters of cells.

**Additional File 2: Table S1**. scRNA-seq gene expression.

**Additional File 3: Table S2**. scRNA-seq marker genes for each cluster.

**Additional File 4: Table S3.** Protein expression in proteomics analysis (all).

**Additional File 5: Table S4.** Differentiallyexpressedproteins.

**Additional File 6: Table S5.** Protein cluster in Fig.1g.

**Additional File 7: Table S6.** Protein enrichment for Fig. 1g.

**Additional File 8: Table S7.** Marker genes for Ims.

**Additional File 9: Fig. S2 Summary of scRNA-seq data for immune cells (Im), related to Figure 2. a** Heatmap of the top 25 marker genes in each cluster of Im. **b** Expression pattern of marker genes in different clusters of Im. **c** Trajectory reconstruction of Im based on cell clusters according to pseudotime analysis. (i). Monocle plot. (ii). RNA velocity vector projection on a monocle plot. **d** Monocle images for different samples at 5 time points. **e** Protein levels of *IL6* in different samples at different time points according to IHF.

**Additional File 10: Table S8.** Top 50 specifically expressed genes in each cluster.

**Additional File 11: Fig. S3 Summary of scRNA-seq data for cecal enterocytes (CC), related to Figure 3.** **a** Heatmap of the top 25 marker genes in each cluster of CC. **b** The expression pattern of marker genes in different clusters of CC. **c** Trajectory reconstruction of CC based on cell clusters following pseudotime analysis. (i). Monocle plot. (ii). RNA velocity vector projection on monocle plots. **d** Monocle images for different samples at 5 time points. **e** The protein levels of *FTH1* and *FABP* in different samples at different time points according to IHF.

**Additional File 12: Table S9.** Marker genes for CCs.

**Additional File 13: Fig. S4 Summary of scRNA-seq data for goblet cells, related to Figure 4. a** The heatmap of the top 25 marker genes in each cluster of goblet cells. **b** The expression pattern of marker genes in different clusters of goblet cells. **c** Trajectory reconstruction of goblet cells based on cell clusters following pseudotime analysis. (i). Monocle plot. (ii). RNA velocity vector projection on a monocle plot. **d** Monocle images for different samples at 5 time points. **e** IHF for the protein expression of goblet cell marker gene *TFF3*.

**Additional File 14: Table S10.** Marker genes for Goblet.

**Additional File 15: Fig. S5 Summary of scRNA-seq data for Paneth like cells (PLC).** **a** Cell type clusters for PLC. (i) t-SNE of PLC single cells (points), colored by cluster assignment. (ii) RNA velocity vector projection on t-SNE plot. **b** The heatmap of the top 25 marker genes in each cluster of PLC. **c** Expression pattern of marker genes in different clusters of PLC. **d** Decrease in PLC population during development (from d0 to d21). **e** Trajectory reconstruction of PLC based on cell clusters following pseudotime analysis. (i). Monocle plot. (ii). RNA velocity vector projection on a monocle plot. **f** Monocle images for different samples at 5 time points, or different clusters of PLC. **g** The expression pattern of the top 50 specifically expressed genes in PLC. **h** Protein levels of *LYZL1* in the different samples at different time points according to IHF.

**Additional File 16: Table S11.** Marker genes for PLCs.

**Additional File 17: Fig. S6 Summary of scRNA-seq data for EEC. a** Cell type clusters for EEC. (i) t-SNE of EEC single cells (points), colored by cluster assignment. (ii) RNA velocity vector projection on t-SNE plots. **b** Heatmap of the top 25 marker genes in each cluster of EEC. **c** Expression pattern of marker genes in different EEC clusters. **d** EEC population decrease during development (from d0 to d21). **e** EEC trajectory reconstruction based on cell clusters following pseudotime analysis. (i). Monocle plot. (ii). RNA velocity vector projection on a monocle plot. **f** Monocle images for different samples at 5 time points, or different clusters of EEC. **g** Expression pattern of the top 50 specifically expressed genes in EEC. **h** Protein levels of *CHGA* in different samples at different time points according to IHF.

**Additional File 18: Table S12.** Marker genes for EECs.

**Additional File 19: Fig. S7 Increase in piglet cecum undifferentiated cells (U1/U2) during the neonatal window. a** Cell type clusters for U1/U2. (i) t-SNE of undifferentiated single cells (points), colored by cluster assignment. (ii) RNA velocity vector projection on t-SNE plots. **b** Heatmap of the top 25 marker genes in each cluster of U1/U2. **c** Expression pattern of marker genes in different clusters of U1/U2. **d** U1/U2 population changes during development (from d0 to d21). **e** Trajectory reconstruction of U1/U2 based on cell clusters according to pseudotime analysis. (i). Monocle plot. (ii). RNA velocity vector projection on a monocle plot. **f** Monocle images for different samples at 5 time points. **g** Heatmap of cluster genes for the cell cycle in different clusters of cells. **h** Heatmap of cluster genes for the cell cycle in samples at different time points. **i** Expression pattern of the top 50 specifically expressed genes in U1/U2. **j** Protein levels of some of the top 50 specifically expressed genes from the proteomic analysis. **k** Protein levels of *SOX9* and *Ki67* in different samples at different time points according to IHF. **l** Protein levels of *PCNA* in different samples at different time points according to WB.

**Additional File 20: Table S13.** Marker genes for undifferentiated expressed genes.

**Additional File 21: Table S14.** Expression of TFs.

**Additional File 22: Fig. S8 Expression patterns of GPCRs, members of TGF-b, and BMP signaling pathways, related to Figure 5.** **a** IHF images of some of the TFs: *Pou2AF1*, and *FOXO3a* at different time points from d0 to d21. (B) WB images of some of the TFs: *MYBL2*, and *GATA6* at different time points from d0 to d21. (C) Expression pattern of GPCRs in different clusters of cecal epithelium. (D) The expression pattern of GPCRs in samples from different time points. (E) Expression pattern of members of TGF-b and BMP pathways in different clusters of the cecal epithelium. (F) Expression pattern of members of TGF-b and BMP pathways in samples from different time points.

**Additional File 23: Table S15.** Ligand-receptor.

**Additional File 24: Fig. S9** Changes in cecal content microbiota. (A) Alpha index of the cecal mucosa microbiota: Shannon, Simpson, Chao1, and ACE index. (B) Alpha index of the cecal content microbiota: Shannon, Simpson, Chao1, and ACE index. (C) The PCA of the microflora in cecal content samples from different time points. (D) Differences in bacterial abundance at the genus level in cecal content. (E) Relative proportion of the 10 major microbiota in cecal content. (F) Pearson correlation of the proportion of cecal content microbiota and the proportion of different clusters of cells.

**Additional File 25: Table S16.** Relative abundance of microbiota for cecal mucosa.

**Additional File 26: Table S17.** Relative abundance of microbiota for cecal content.

**Additional File 27: Table S18.** Correlation of microbiota of cecal mucosa and cecal content.

**Additional File 28: Table S19.** Correlation of microbiota of cecal mucosa and cell population.

**Additional File 29: Table S20.** Correlation of microbiota of cecal content and cell population.

**Additional File 30: Table S21.** Plasma metabolites.

**Additional File 32: Table S22.** Continuing increased plasma metabolites during the neonatal period.

**Additional File 32: Table S23.** Correlation of microbiota of cecal mucosa and plasma metabolites.

**Additional File 33: Table S24.** Correlation of microbiota of cecal content and plasma metabolites.

**Additional File 34: Table S25.** Primary antibodies.
